# Supplementary material for: Role of Cordycepin and Adenosine on the Phenotypic Switch of Macrophages via Induced Anti-inflammatory Cytokines
Source: PubMed Central journal article supplement — Immune Netw. 2009 Dec 31;9(6):255–64. doi: 10.4110/in.2009.9.6.255 (PMC2816959; doi:10.4110/in.2009.9.6.255), 2009-12-31
Supplement: in-9-255-s001.pdf [file in-9-255-s001.pdf]

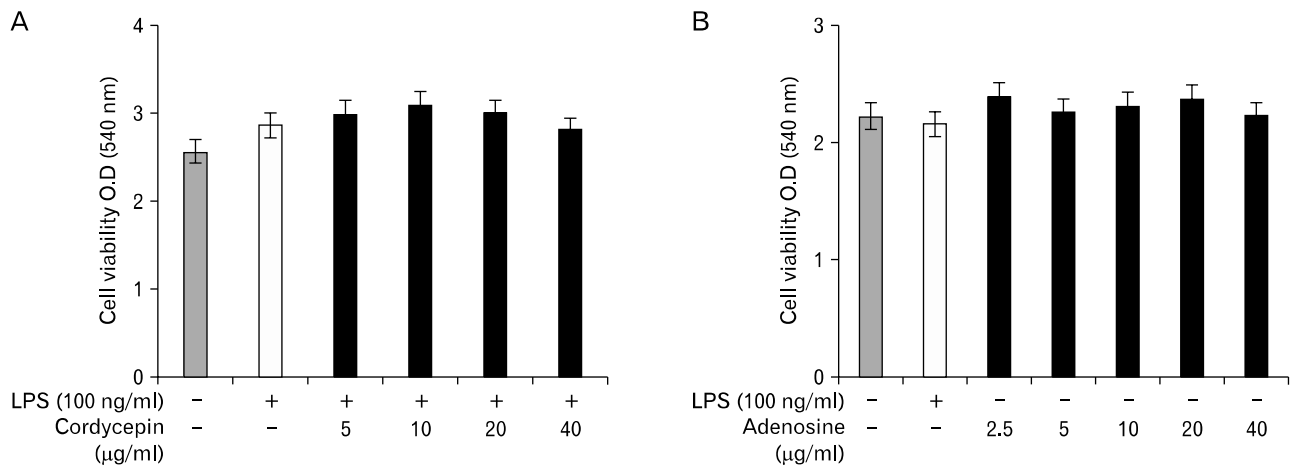

**Supplementary Figure 1.** Effects of cordycepin (A) and adenosine (B) on the cell viability. RAW 264.7 cells were incubated with cordycepin (5~40 μg/ml) in the presence of LPS (100 ng/ml) and adenosine (2.5~40 μg/ml) in the absence of LPS. Values shown are mean±S.D. of three independent experiments.
